# Supplementary material
Source: publisher figshare collection journal article supplement (https://tandf.figshare.com/ndownloader/files/44707823)
Supplement: Supplementary file 1 [file 44707823]

**Table S1: Acronyms and their definitions, as in the manuscript**

| **Acronym** | **Definition** |
| --- | --- |
| AERONET | AErosol RObotic NETwork |
| AGE | aerosol/gas emissions |
| AOD | aerosol optical depth |
| ASTER | Advanced Spaceborne Thermal Emission and Reflection Radiometer |
| BC | black carbon |
| BG | background |
| CH4 | methane |
| CO | carbon monoxide |
| CO2 | carbon dioxide |
| ECMWF | European Centre for Medium-range Weather Forecast |
| ER | Enhancement ratio |
| ERA5 | 5th generation ECMWF model |
| ERF | Fraction of expected responces |
| EU | European Union |
| FC | fire count |
| FRP | fire radiative power |
| HCHO | formaldehyde |
| MAX-DOAS | Multi-AXis Differential Optical Absorption Spectroscopy |
| MODIS | Moderate Resolution Imaging Spectroradiometer |
| MOPITT | Measurement of Pollution in the Troposphere |
| MP | meteorological parameters |
| MZ | Middle Zone, 55º–65º N |
| N | nitrogen |
| NASA | National Aeronautics and Space Administration |
| NOx | nitrogen oxides |
| NZ | Northern Zone, 65º–73º N |
| O3 | Ozone |
| OMI | Ozone Monitoring Instrument |
| OC | Organic carbon |
| OH | hydroxyl radical |
| PEEX | Pan-Eurasian Experiment |
| PM | particulate matter |
| QA4ECV | Quality Assurance for Essential Climate Variables, project |
| SILAM | System for Integrated Modelling of Atmospheric Composition |
| SSA | single scattering albedo |
| SSZ | south from SZ |
| SZ | Southern zone, 45º–55º N |
| TEMIS | Tropospheric Emission Monitoring Internet Service |
| VOC | volatile organic compound |

**Table S2: Coordinates (latitude, lat; longitude, lon) of the areas as in Figure 1**

| **area, N** | **lat, min** | **lat, max** | **lon, min** | **lon, max** |
| --- | --- | --- | --- | --- |
| 1 | 56 | 72 | 5 | 30 |
| 2 | 65 | 73 | 30 | 50 |
| 3 | 65 | 73 | 50 | 70 |
| 4 | 65 | 73 | 70 | 90 |
| 5 | 65 | 73 | 90 | 110 |
| 6 | 65 | 73 | 110 | 130 |
| 7 | 65 | 73 | 130 | 150 |
| 8 | 55 | 65 | 30 | 50 |
| 9 | 55 | 65 | 50 | 70 |
| 10 | 55 | 65 | 70 | 90 |
| 11 | 55 | 65 | 90 | 110 |
| 12 | 55 | 65 | 110 | 130 |
| 13 | 55 | 65 | 130 | 150 |
| 14 | 45 | 55 | 30 | 50 |
| 15 | 45 | 55 | 50 | 70 |
| 16 | 45 | 55 | 70 | 90 |
| 17 | 45 | 55 | 90 | 110 |
| 18 | 45 | 55 | 110 | 130 |
| 19 | 35 | 45 | 110 | 130 |
| 20 | 45 | 55 | 130 | 150 |
| 21 | 50 | 60 | 150 | 165 |
| 22 | 60 | 73 | 150 | 180 |
| 23 | 73 | 78 | 85 | 115 |


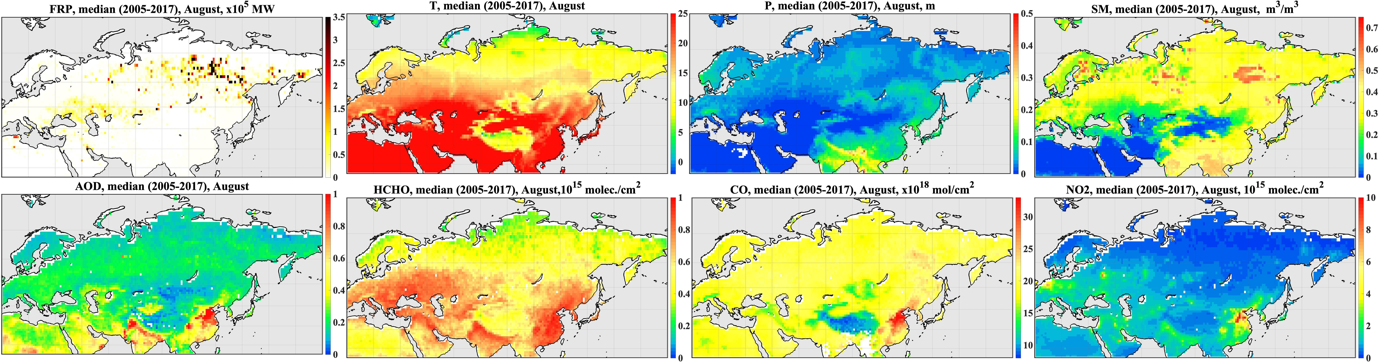


**Figure S1: Median FRP, temperature (T), precipitation (P), soil moisture (SM), AOD, HCHO, CO, and NO2 for August, for the period 2005–2017 over the PEEX domain.**


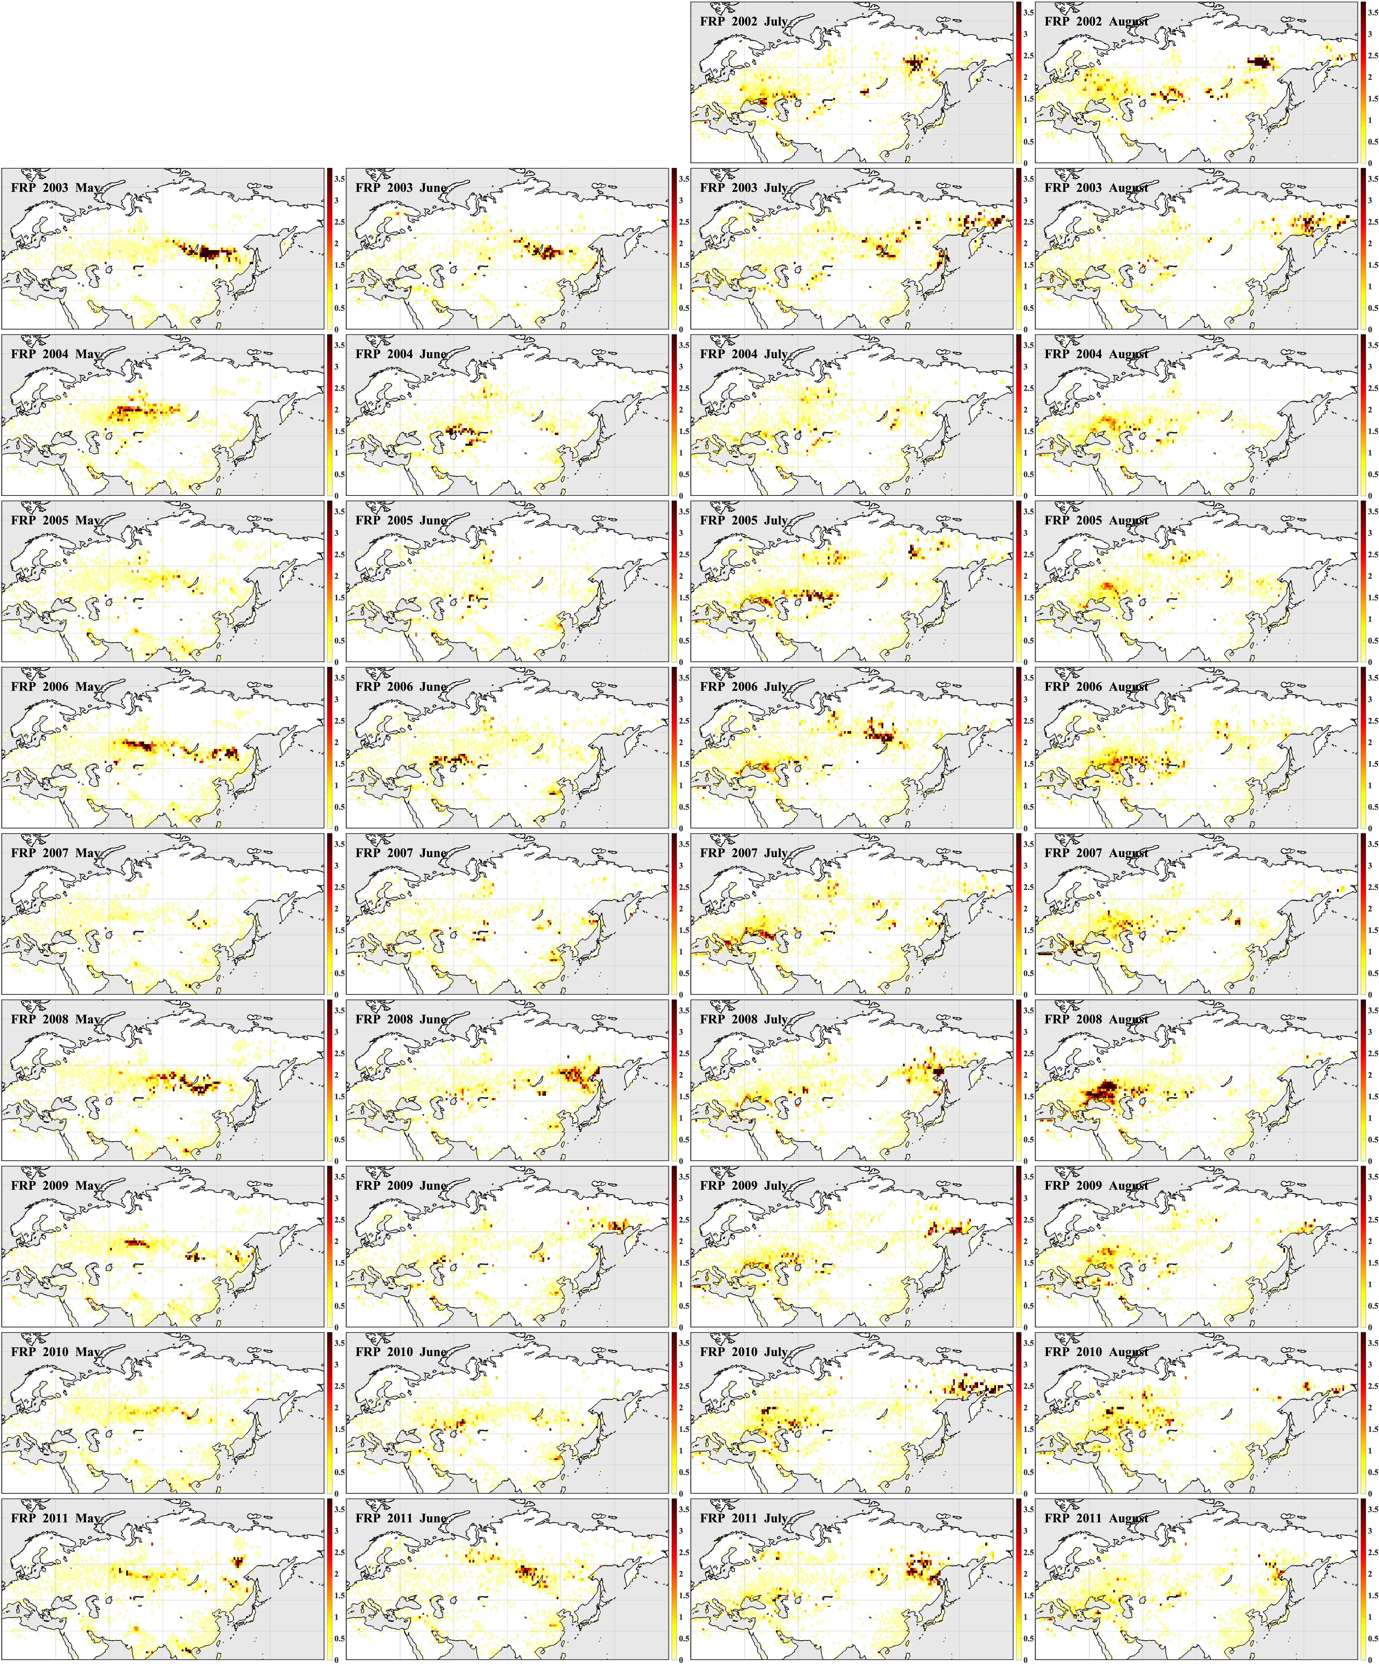


**Figure S2: Monthly cumulative FRP for months May to August (panels left to right), 2002–2011 (panels top down).**


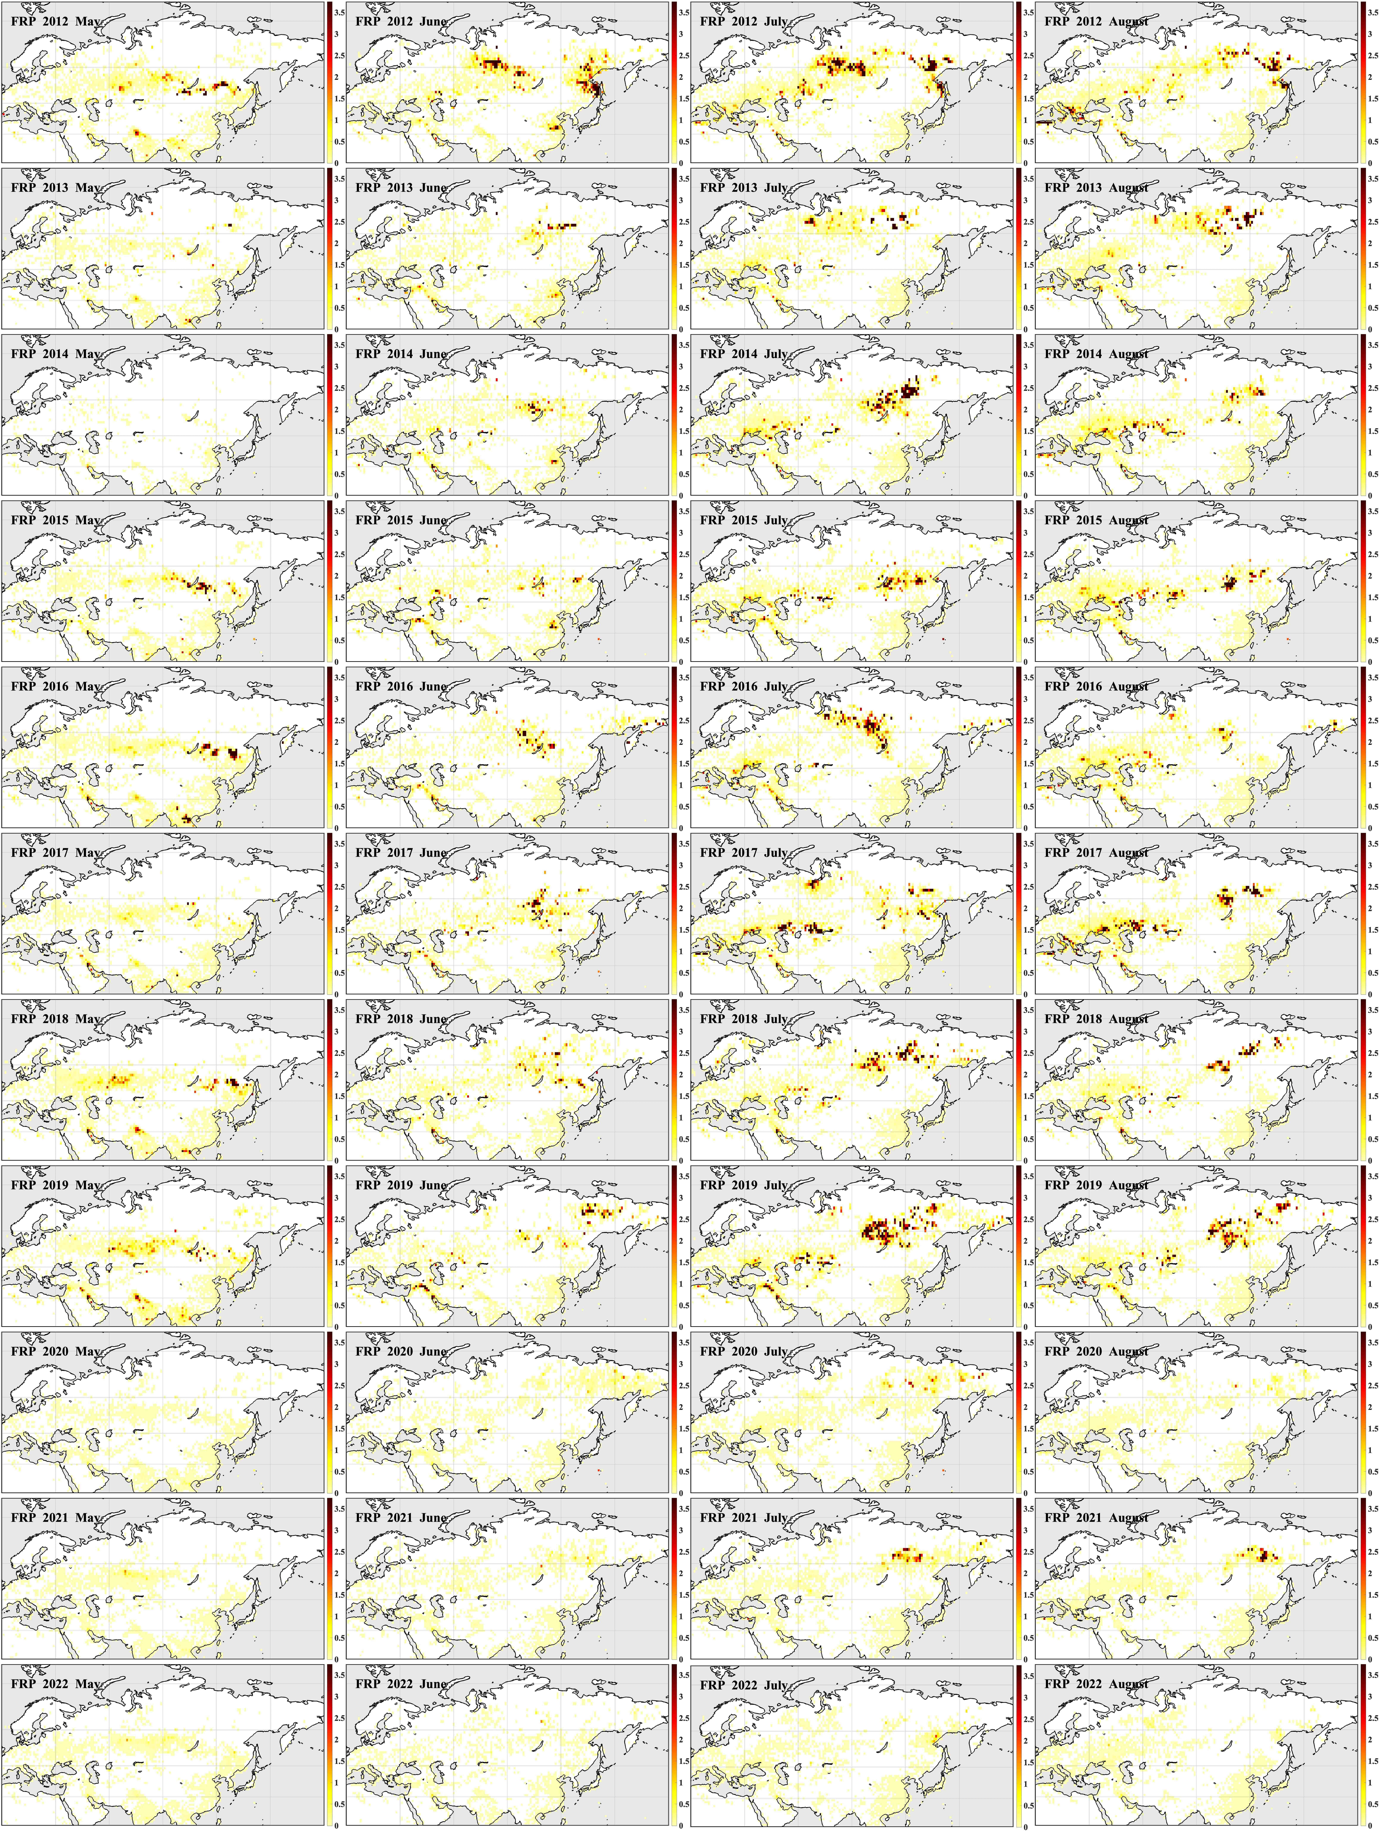


**Figure S3: Same as Fig. S2, 2012–2022 (panels top down).**


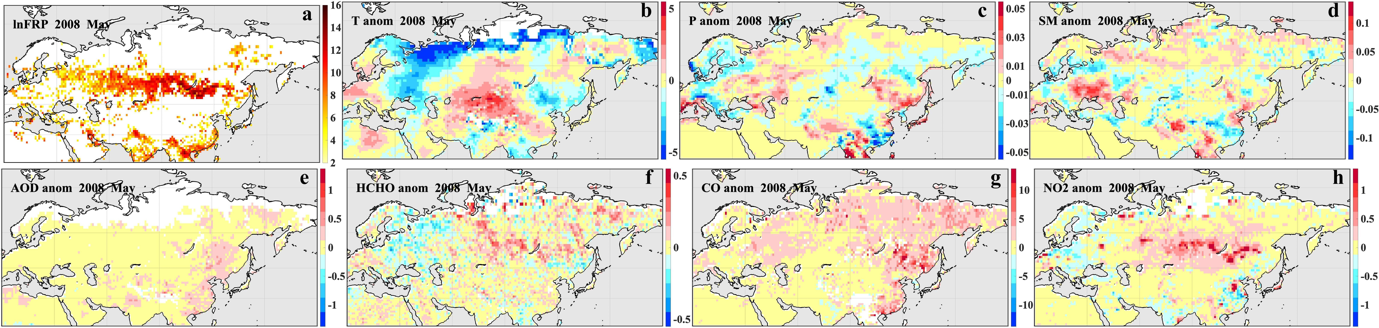


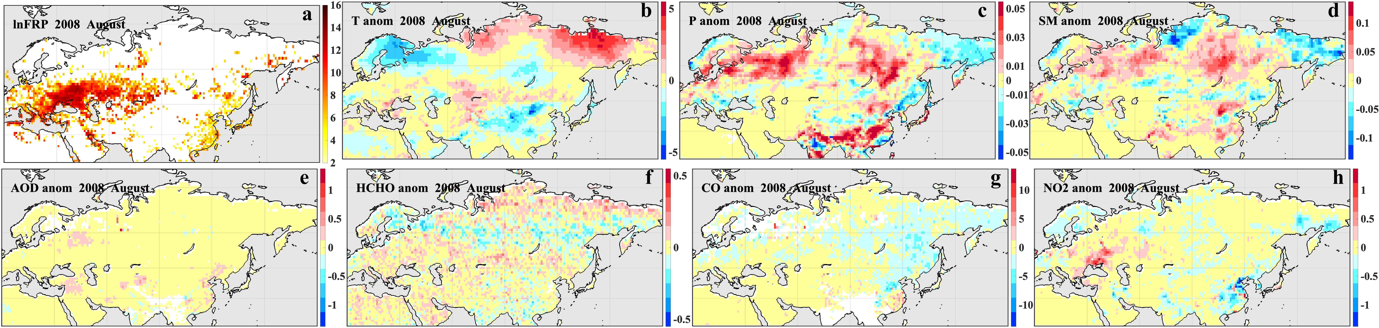


**Figure S4: For predominant cropland fires (May 2008, August 2008, panels top down): ln(FRP) (a), absolute anomalies for temperature T (b), precipitation P (c), soil moisture SM (d), AOD (e), HCHO (f), CO (g), NO2 (h).**


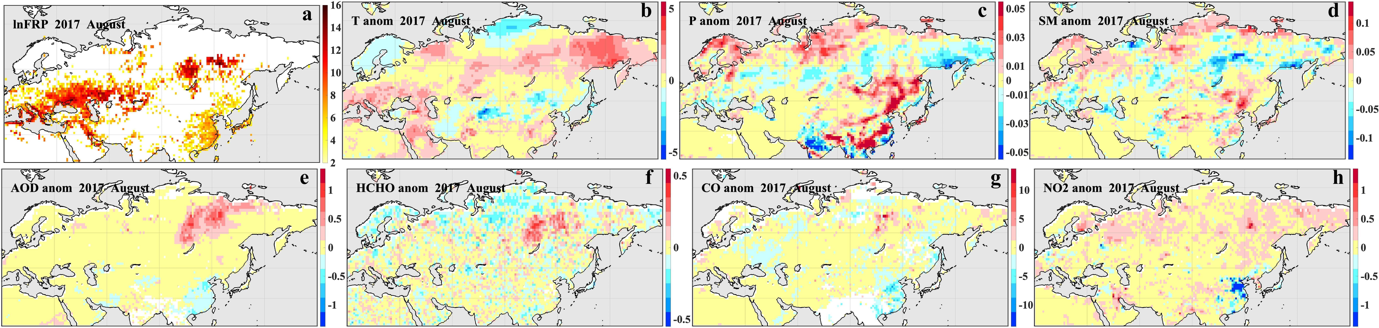


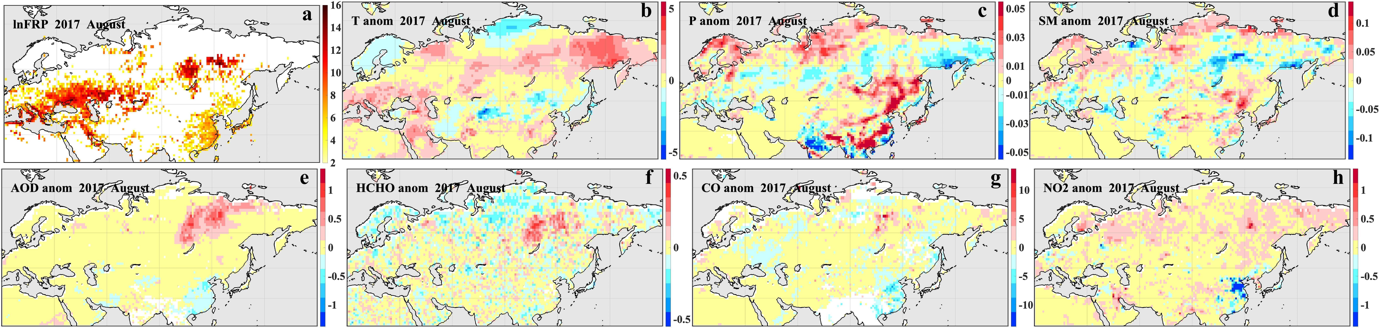


**Figure S5: For predominant forest fires (August 2017 and July 2019, panels top down): ln(FRP) (a), absolute anomalies for temperature T (b), precipitation P (c), soil moisture SM (d), AOD (e), HCHO (f), CO (g), NO2 (h).**


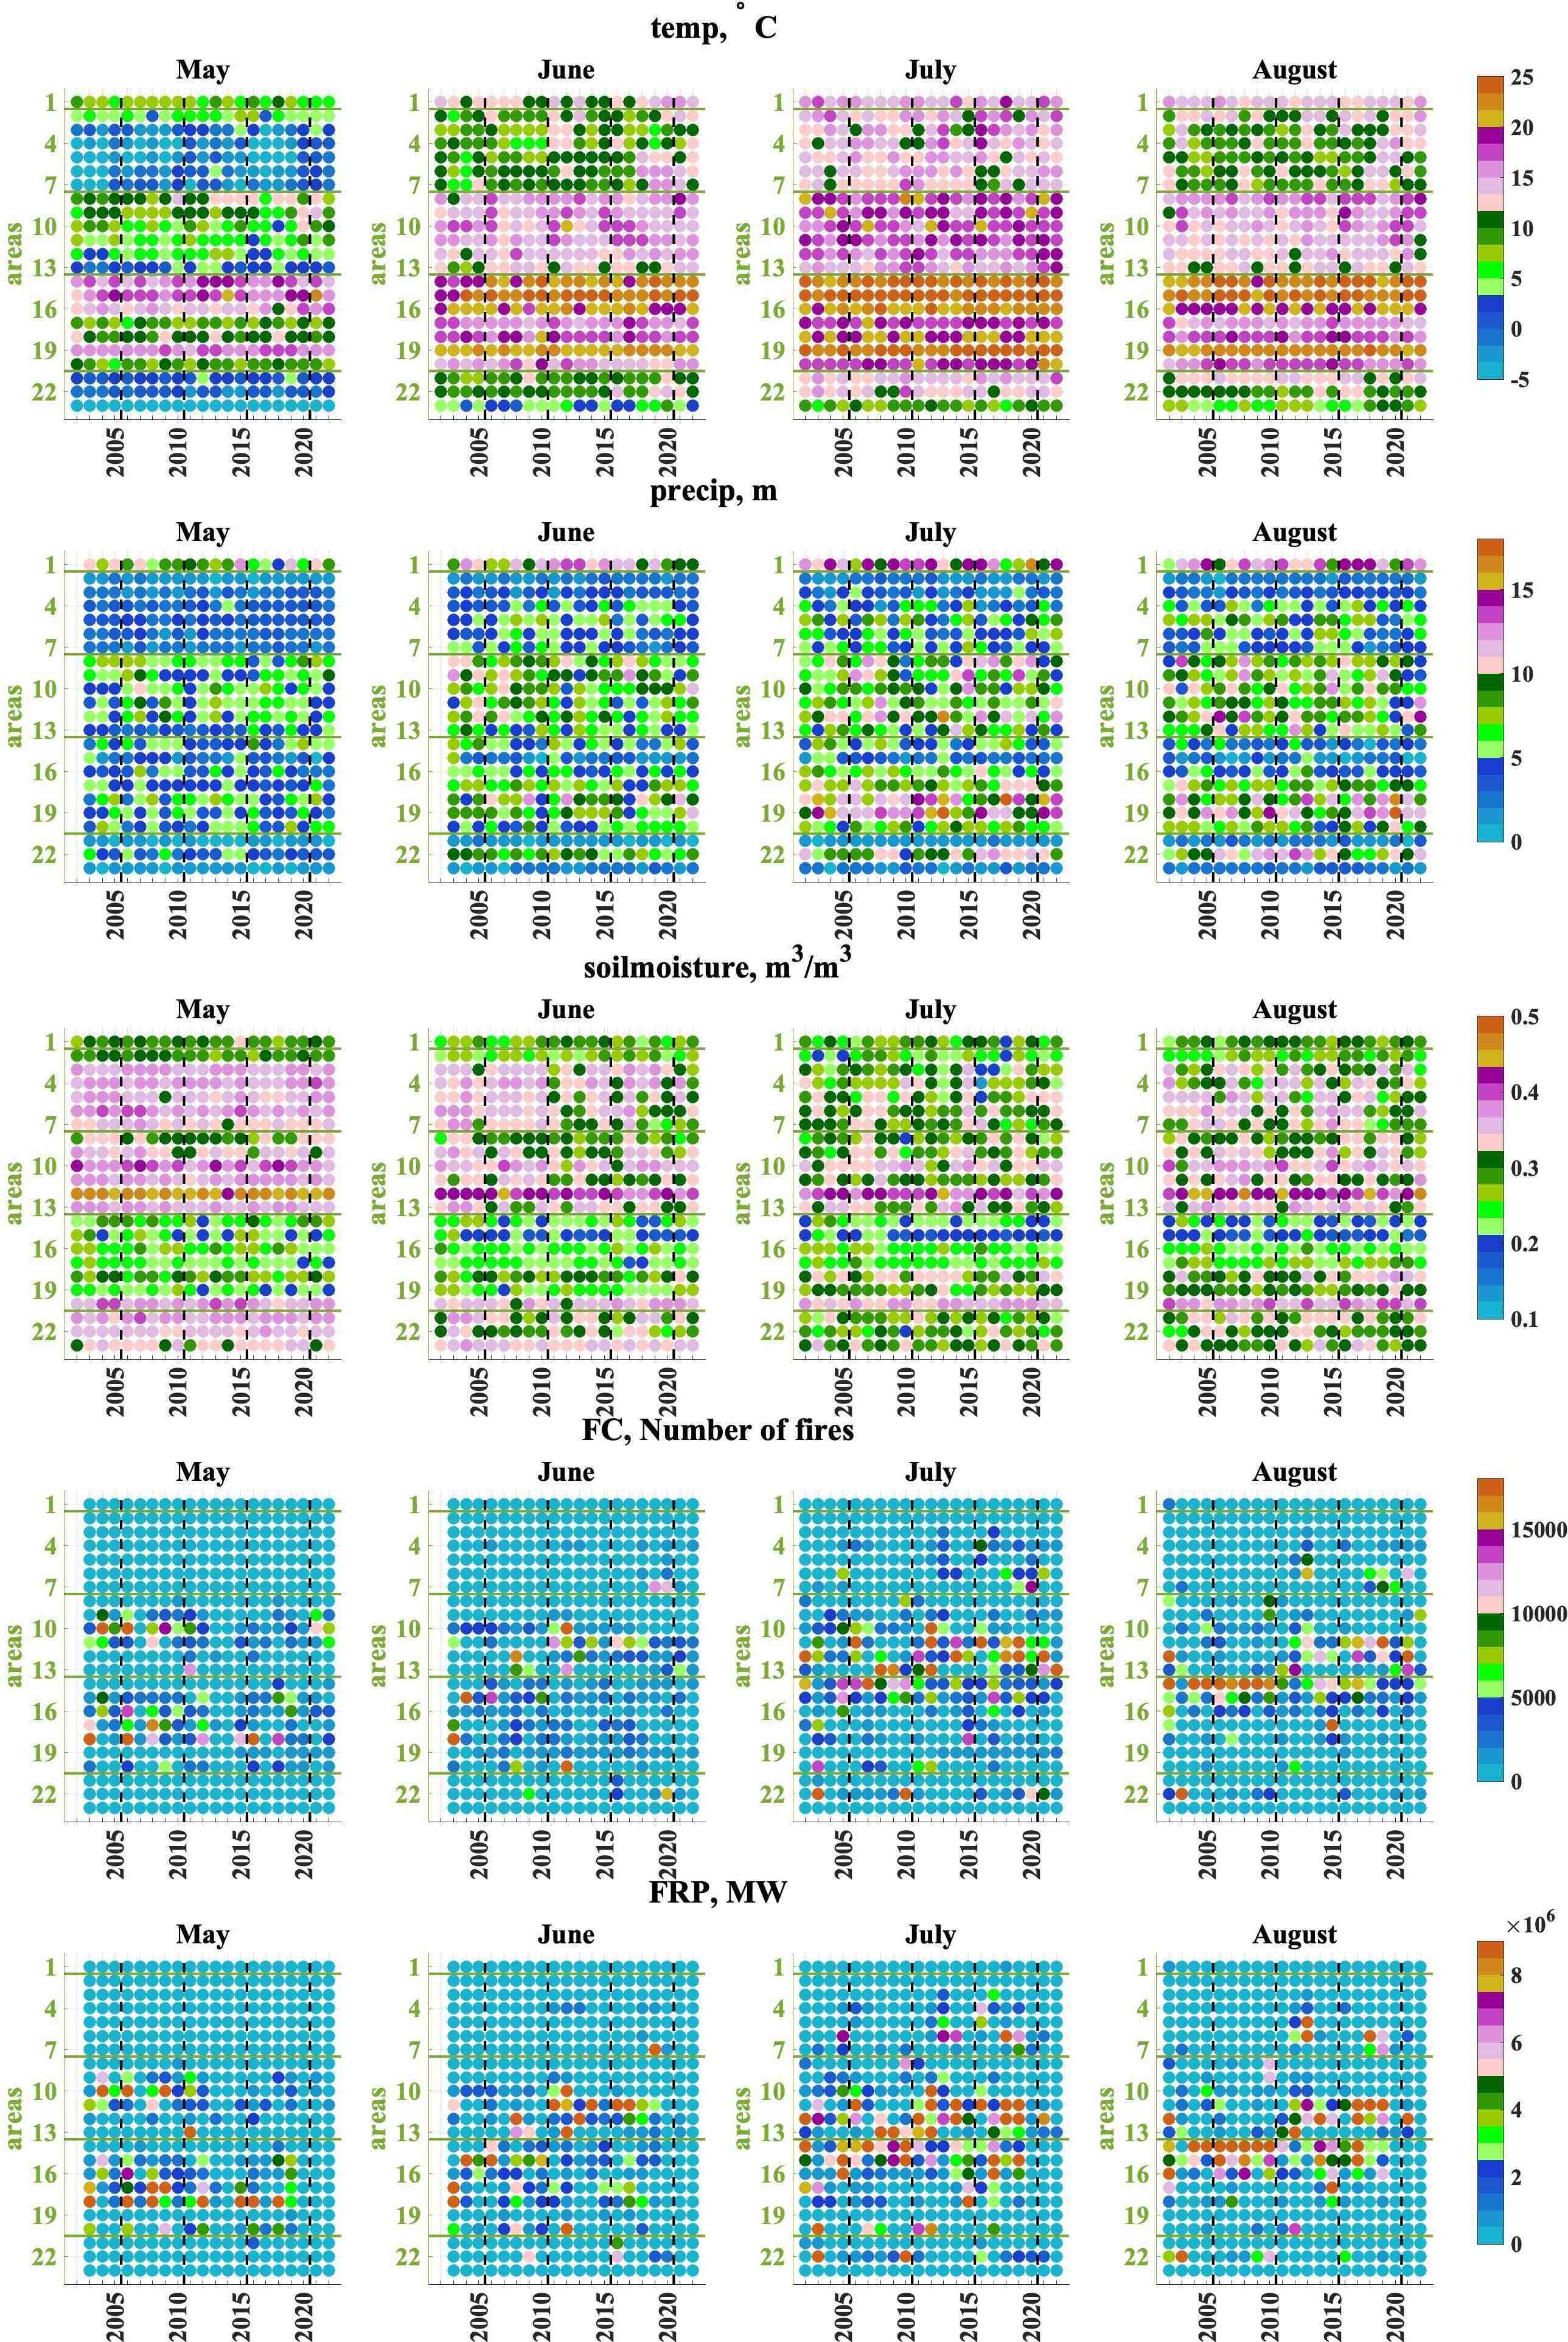


**Figure S6: Temporal and spatial distribution of temperature, precipitation, soil moisture, FC, and FRP (panels top down) for May–August (panels left to right). Y-axis shows the areas defined in Figure 1 (manuscript), while x-axis shows time (years).**


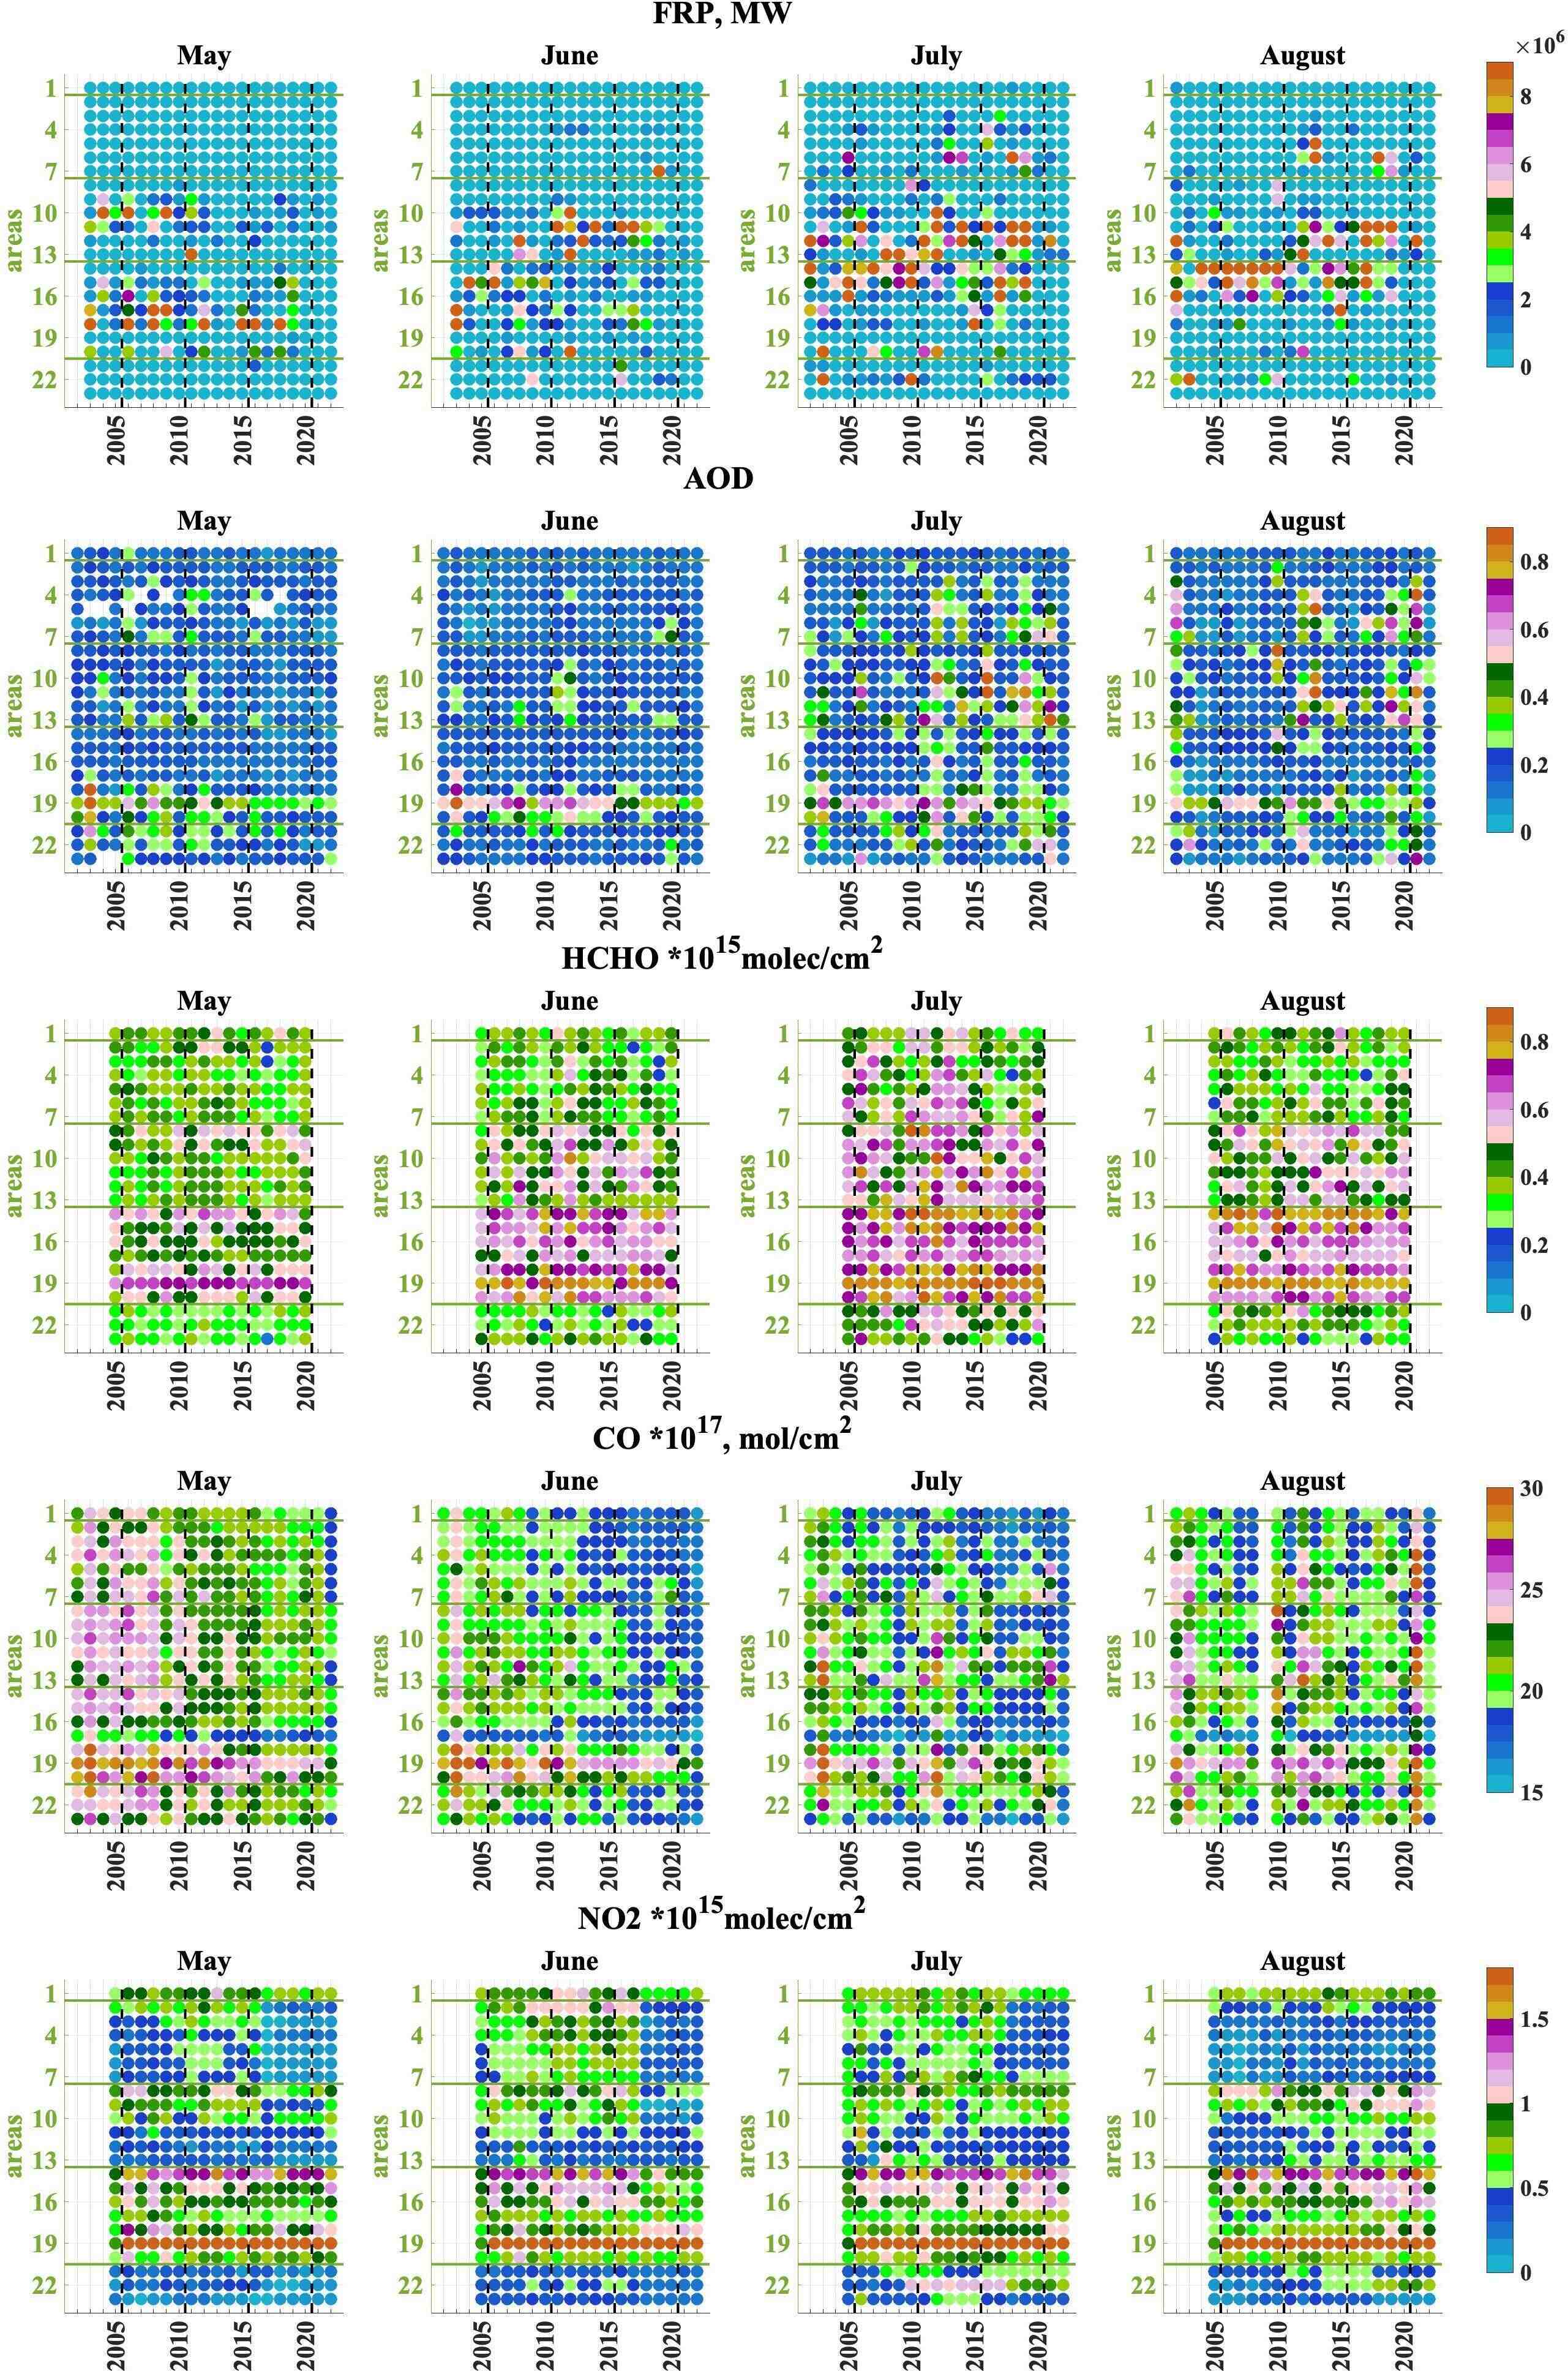


**Figure S7: Temporal and spatial distribution of FRP, AOD, HCHO, CO, and NO2 (panels top down) for May–August (panels left to right) for the areas defined in Figure 1 (manuscript), while x-axis shows time (years).**


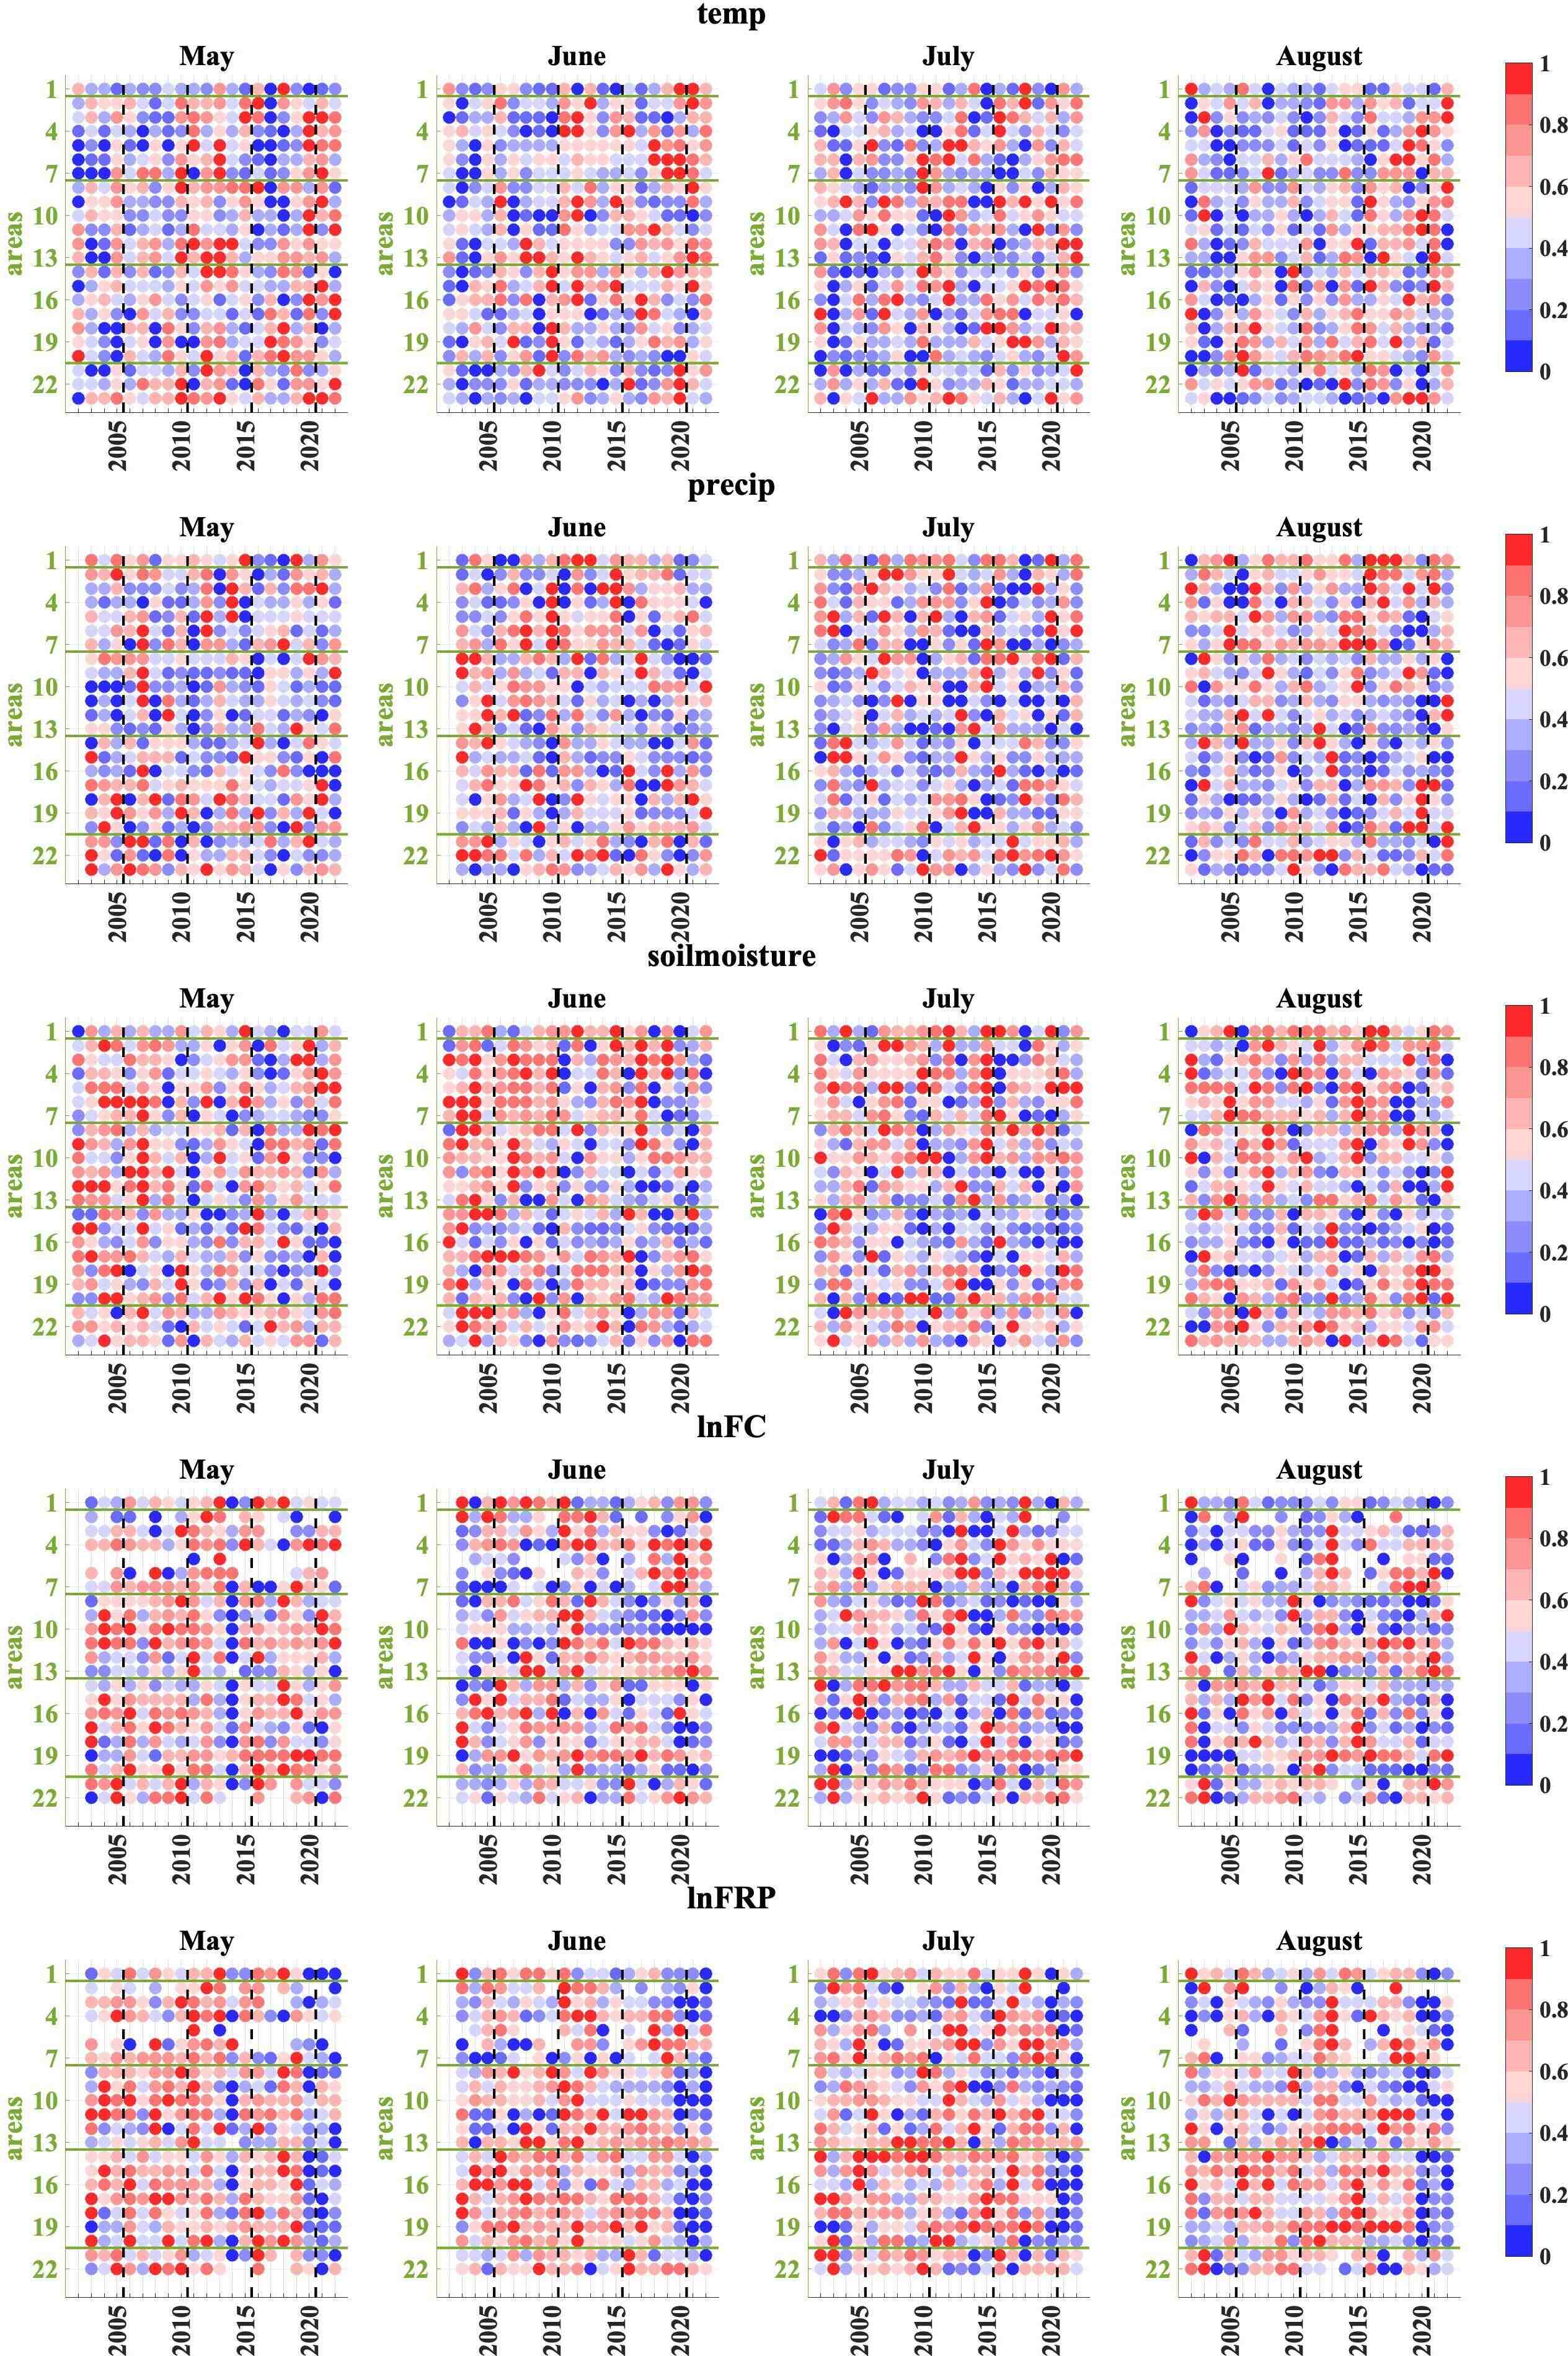


**Figure S8: As Figure S6, for scaled anomalies.**


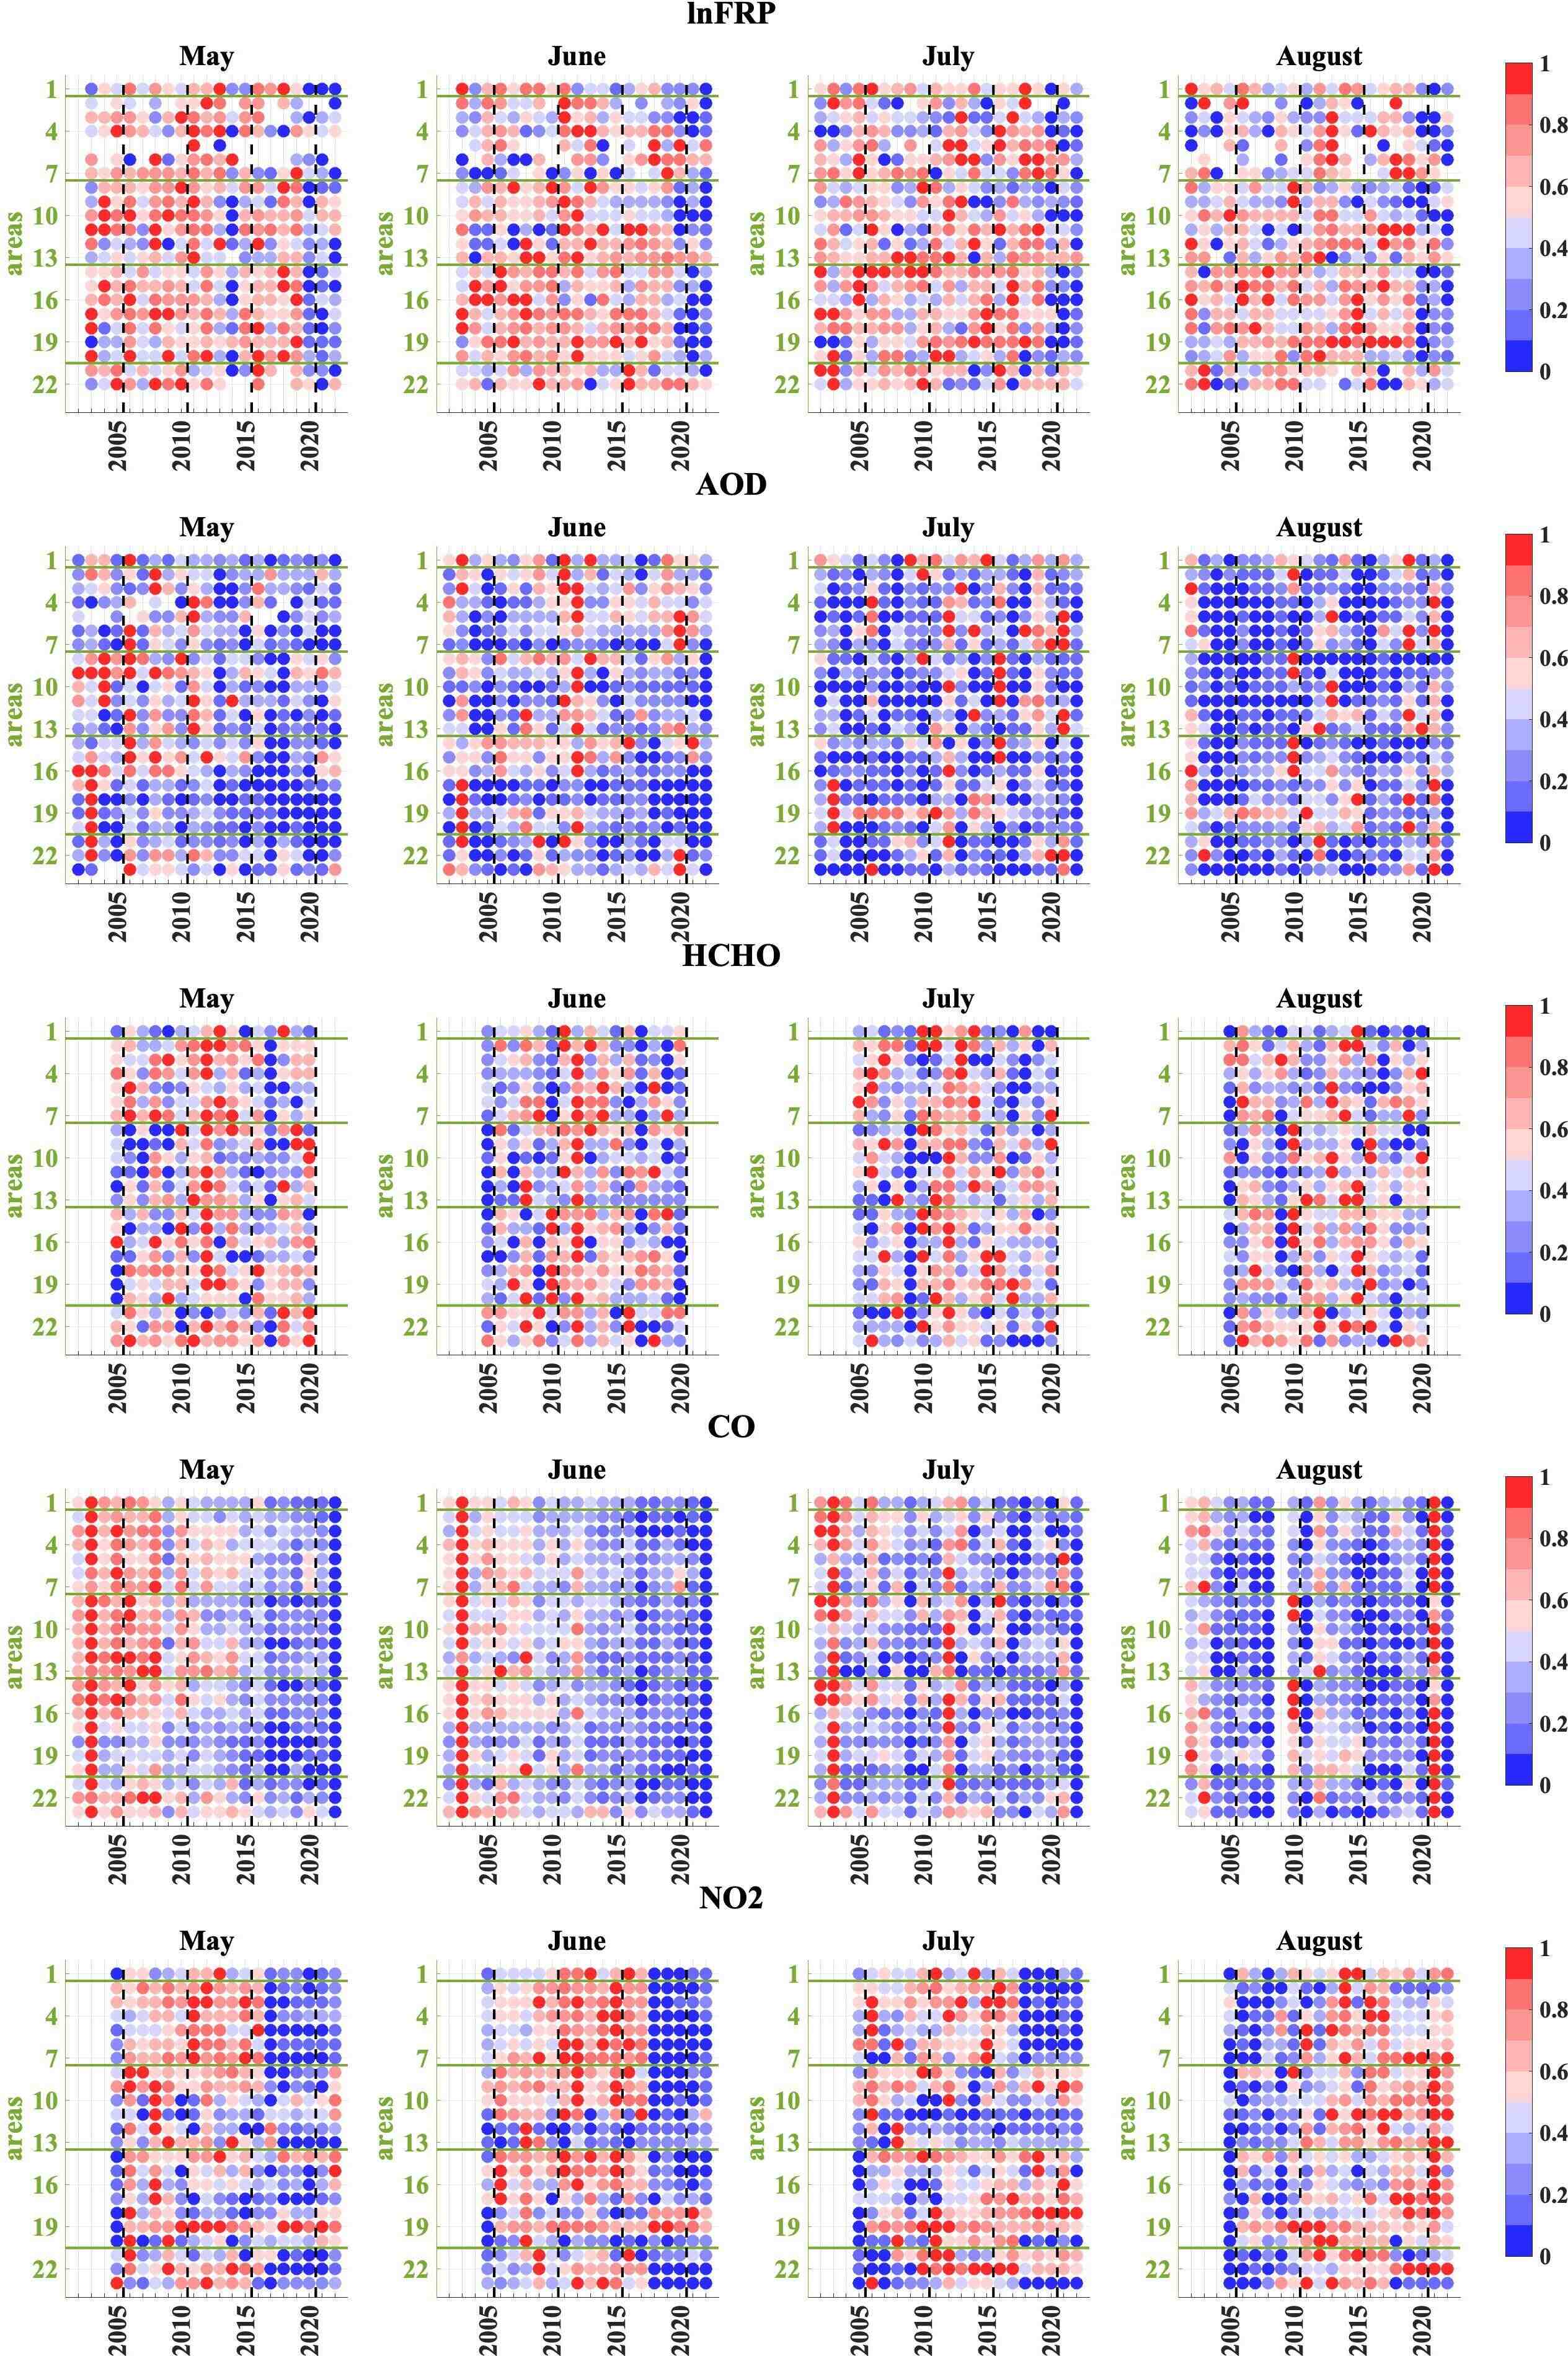


**Figure S9: as Figure S7, for scaled anomalies**


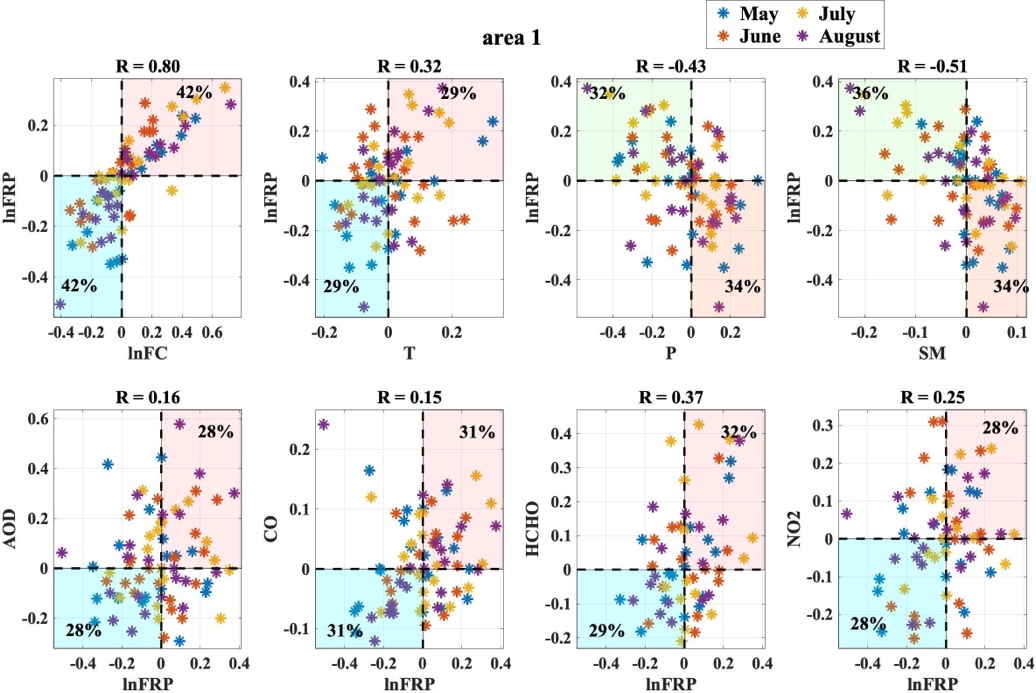


**Figure S10: For Scandinavia (area 1), upper panel: Scatterplots for lnFC, temperature (T), precipitation (P), and soil moisture (SM) monthly relative anomalies (x-axis) for years 2002–2022 and FRP relative anomalies (y-axis). Lower panel: Scatterplots for different combinations of lnFRP relative anomalies (x-axis) and AOD, CO, HCHO, and NO2 (y-axis) relative anomalies. Pearson correlation coefficient R is given on top of each panel. Percentages of points (from the total number of points) are shown in the “expected” quarters (e.g., for precipitation and soil moisture “expected” quarters are sector 90º–180º (T<0 or P <0, and FRP>0, coloured light yellow) and sector 270º–360º (T>0 or P >0 , FRP<0, coloured light orange); for other variables “expected” quarters are sector 0º–90º (anomalies are positive for both variables ,coloured light red) and sector 180º–270º (anomalies are negative for both variables ,coloured light blue) ). The color of the dots shows the month (see the legend).**


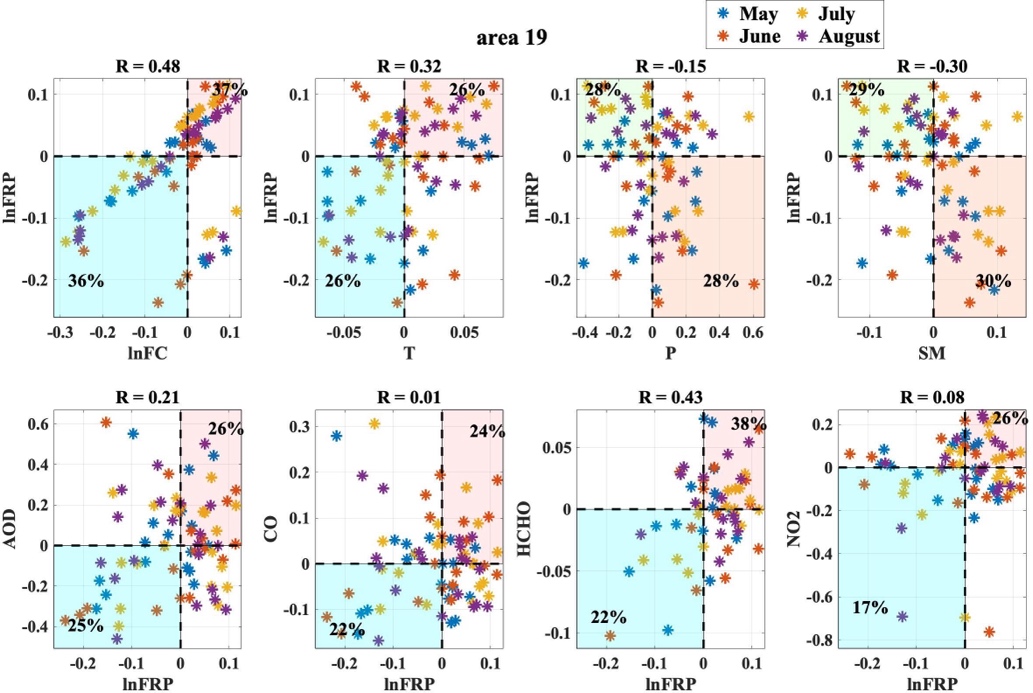


**Figure S11: For central China (area 19), as Figure S10**


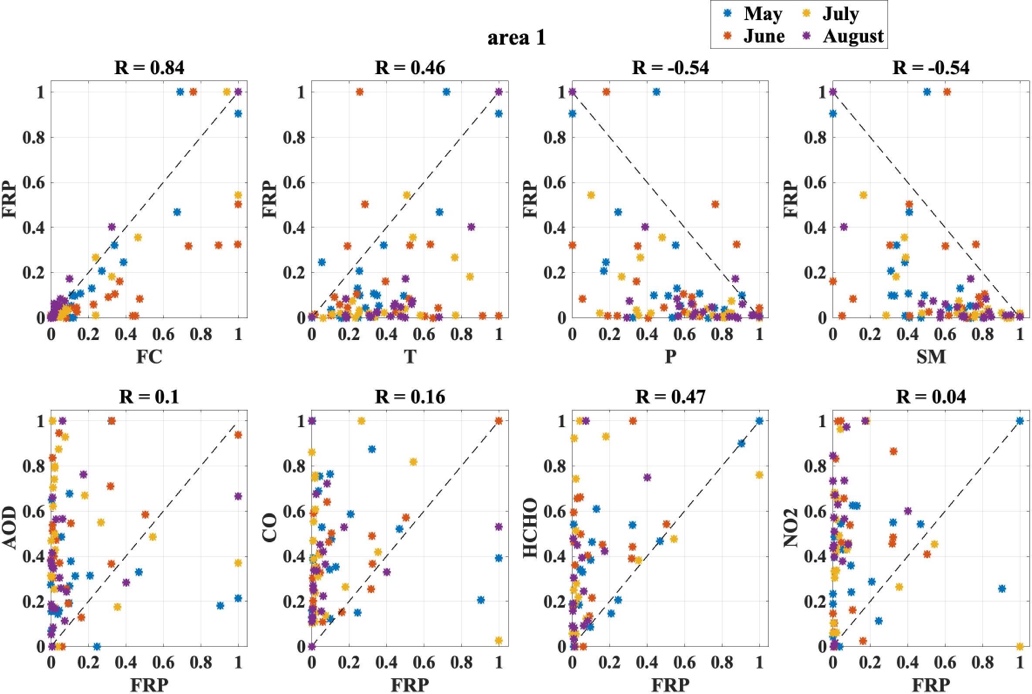


**Figure S12: For Scandinavia (area 1), Upper panel: Scatterplots of scaled FC, temperature (T), precipitation (P), soil moisture (SM) (x-axis), and scaled lnFRP (y-axis). Lower panel: Scatterplots scaled lnFRP (x-axis) and scaled AOD, CO, HCHO, and NO2 (y-axis). The Pearson correlation coefficient R is shown on top of each panel. The color of each fit shows the month (see the legend).**


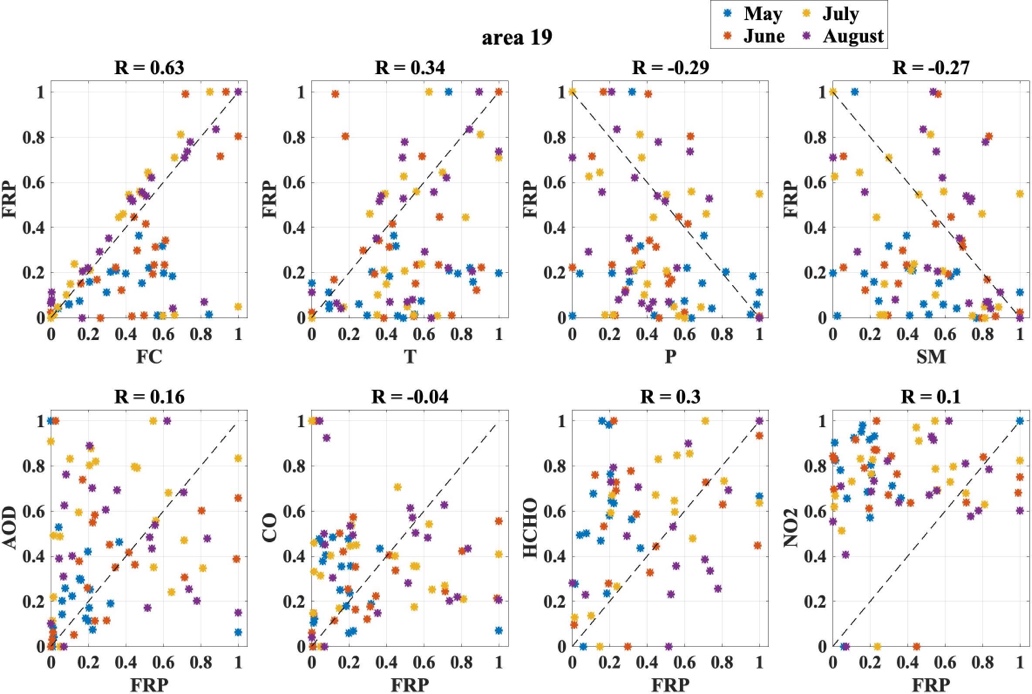


**Figure S13: For Scandinavia (area 1), as Figure S12**


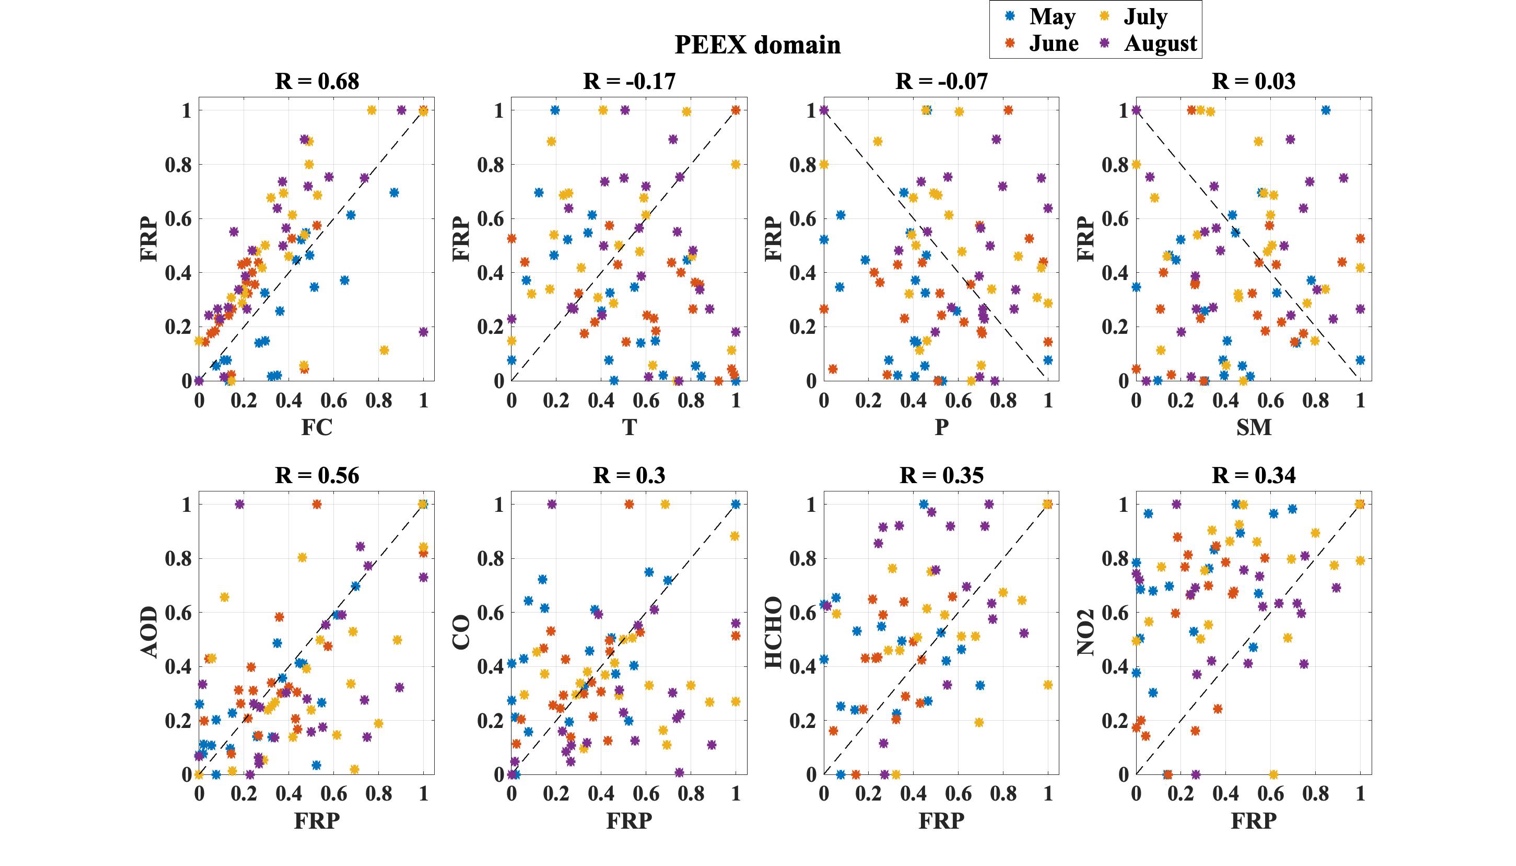


**Figure S14: For the PEEX domain, as Figure S12**


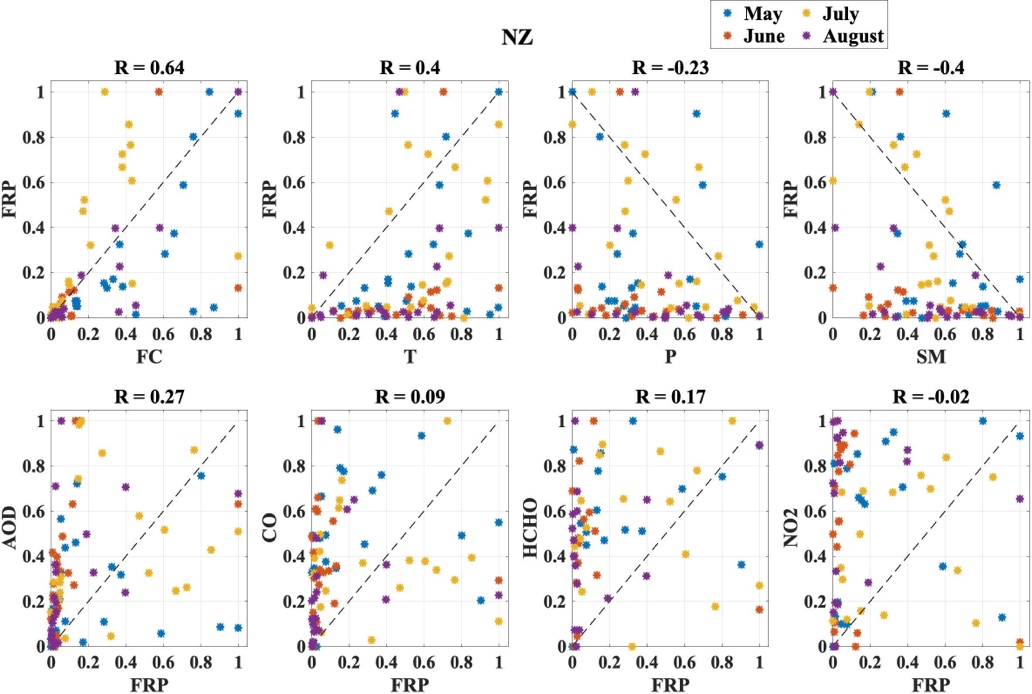


**Figure S15: For NZ, as Figure S12**


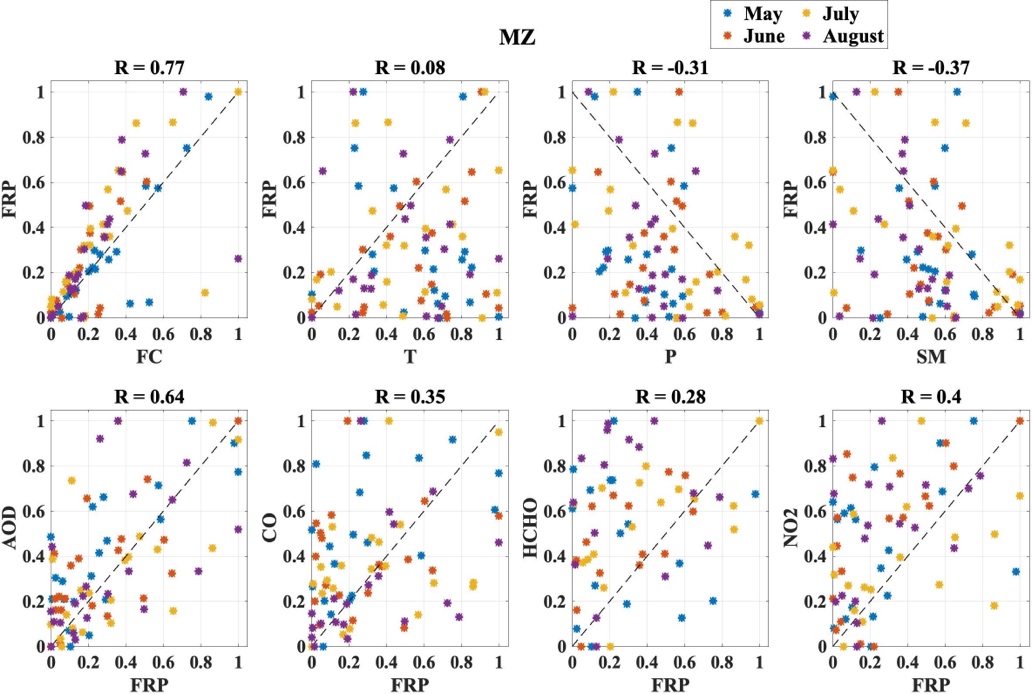


**Figure S16: For MZ, as Figure S12**


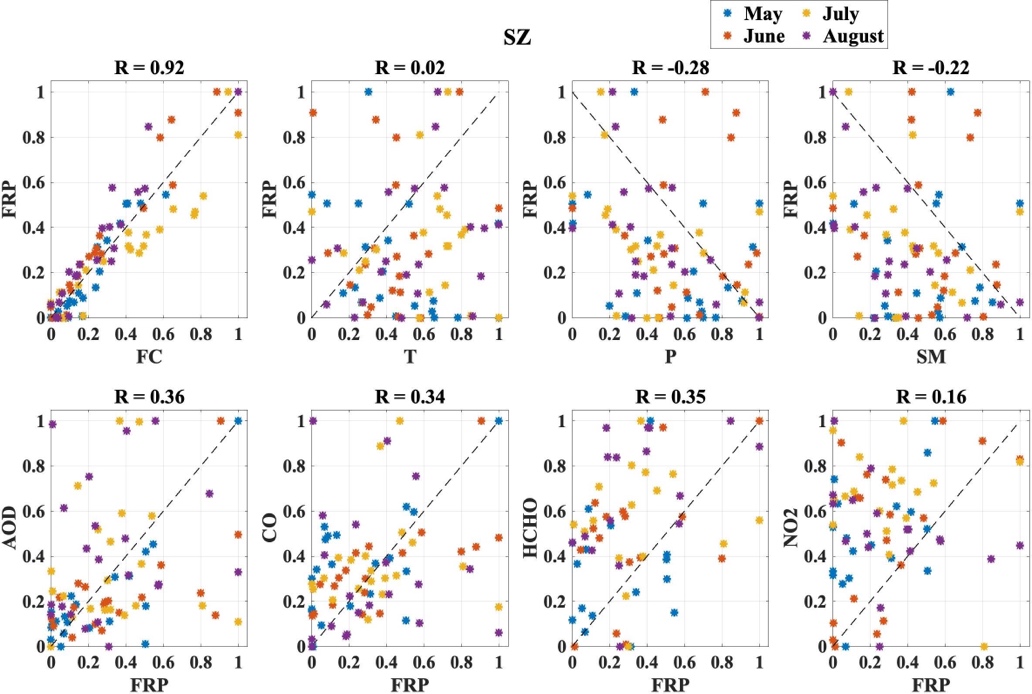


**Figure S17: For SZ, as Figure S12**
